# Supplementary material for: Enhancing electron transport via graphene quantum dot/SnO2 composites for efficient and durable flexible perovskite photovoltaics
Source: Royal Society of Chemistry journal article supplement (doi:10.1039/c8ta10168j), 2018-12-19
Supplement: c8ta10168j1.pdf [file c8ta10168j1.pdf]

## Supporting Information

### For

#### **Enhancing electron transport via graphene quantum dot/SnO<sub>2</sub> composites for efficient and durable flexible perovskite photovoltaics**

Yu Zhou<sup>1</sup>, Sisi Yang<sup>1</sup>, Xuewen Yin<sup>1</sup>, Jianhua Han<sup>1</sup>, Meiqian Tai<sup>1</sup>, Xingyue Zhao<sup>1</sup>,

Hui Chen<sup>2</sup>, Youchen Gu<sup>1</sup>, Ning Wang<sup>2,3\*</sup>, Hong Lin<sup>1\*</sup>

*<sup>1</sup>State Key Laboratory of New Ceramics & Fine Processing, School of Materials*

*Science and Engineering, Tsinghua University, Beijing 100084, China.*

*<sup>2</sup>State Key Laboratory of Electronic Thin Film and Integrated Devices, University of*

*Electronic Science and Technology of China, Chengdu 610054, China.*

*<sup>3</sup>State Key Laboratory of Marine Resource Utilization in South China Sea, Hainan*

*University, Haikou 570228, China*

*\*Corresponding E-mail: hong-lin@mail.tsinghua.edu.cn; wangninguestc@gmail.com*

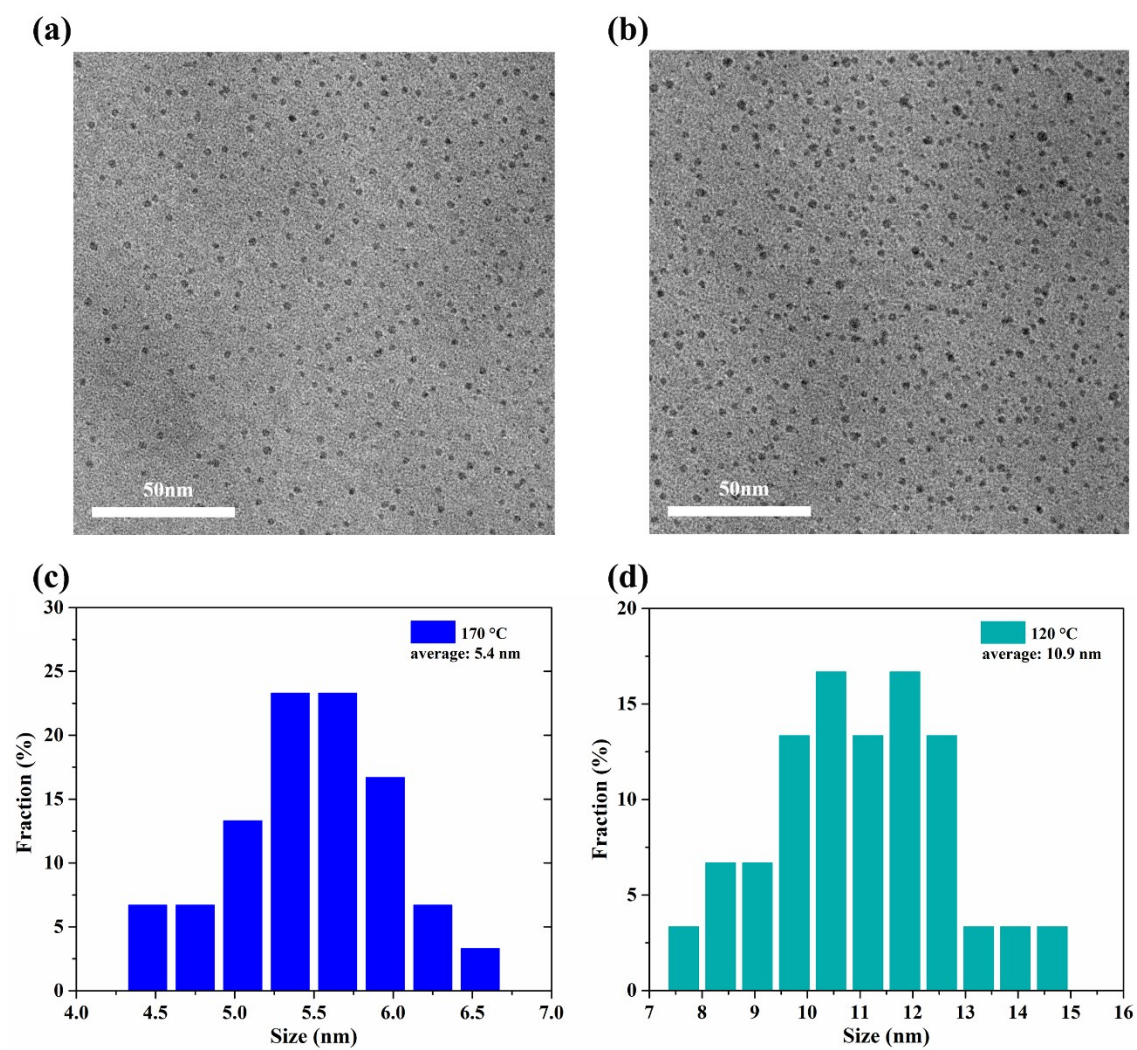

**Fig. S1.** TEM images of synthesized GQDs. (a) synthesized at 170 °C; (b) synthesized at 120 °C; (c) diameter distribution of GQDs-170 °C; (d) diameter distribution of GQDs-120 °C.

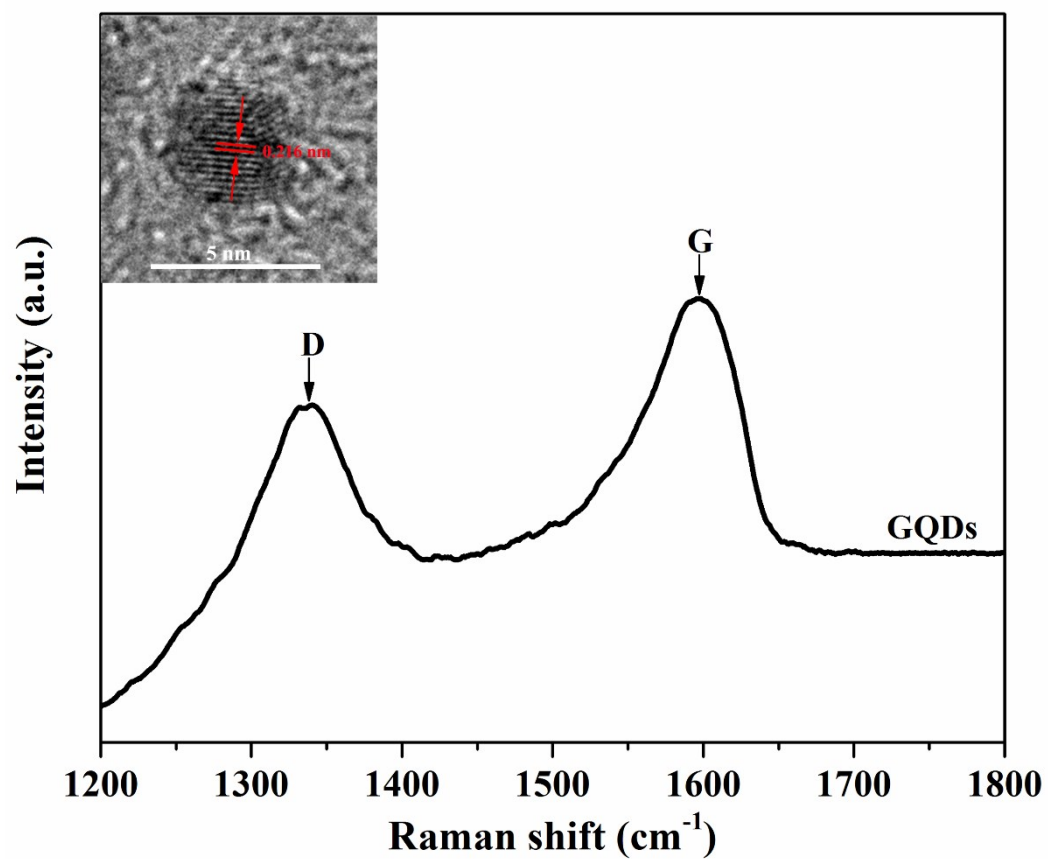

**Fig. S2.** Raman spectrum of synthesized GQDs. The inset is a single GQD's HRTEM image with marked in-plane lattice space.

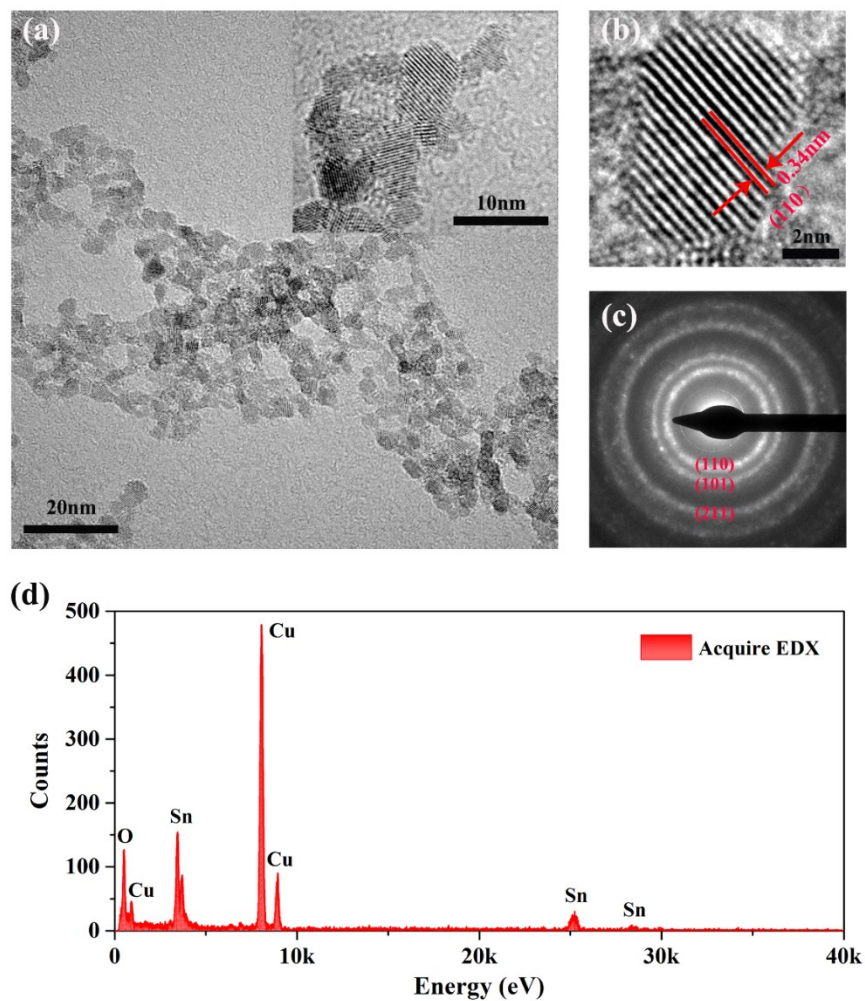

**Fig. S3.** Properties of SnO<sub>2</sub> nanoparticles: (a) TEM image (inset: image with the scale bar of 10 nm); (b) High-resolution TEM image with marked crystal lattice of the (110) plane; (c) Electron diffraction with observed diffraction circles from the (110), (101) and (211) planes of SnO<sub>2</sub> nanoparticles; (d) EDX spectrum of SnO<sub>2</sub> nanoparticles.

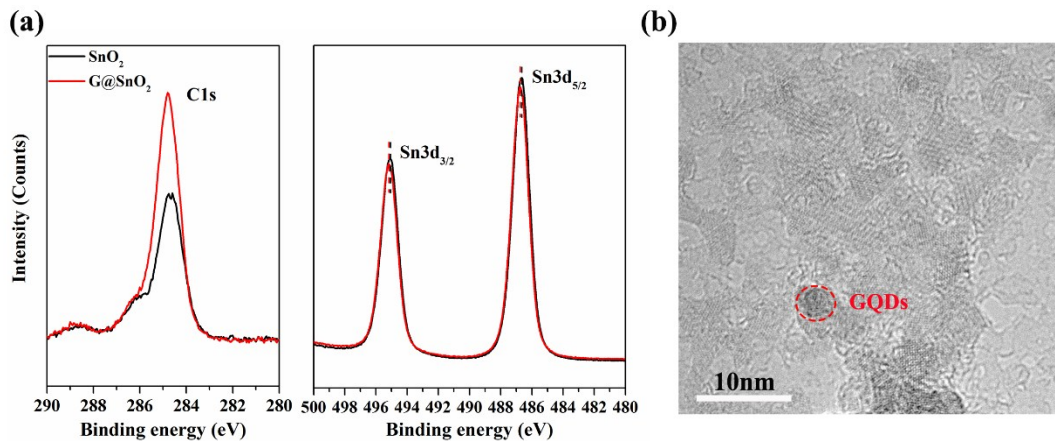

**Fig. S4.** (a) XPS spectra of C1s and Sn3d of SnO<sub>2</sub> and G@SnO<sub>2</sub>. It is obvious that Sn 3d peaks of G@SnO<sub>2</sub> shift to higher binding energy by ~0.10 eV compared to SnO<sub>2</sub>; (b) TEM images of SnO<sub>2</sub> nanoparticles mingled with GQDs.

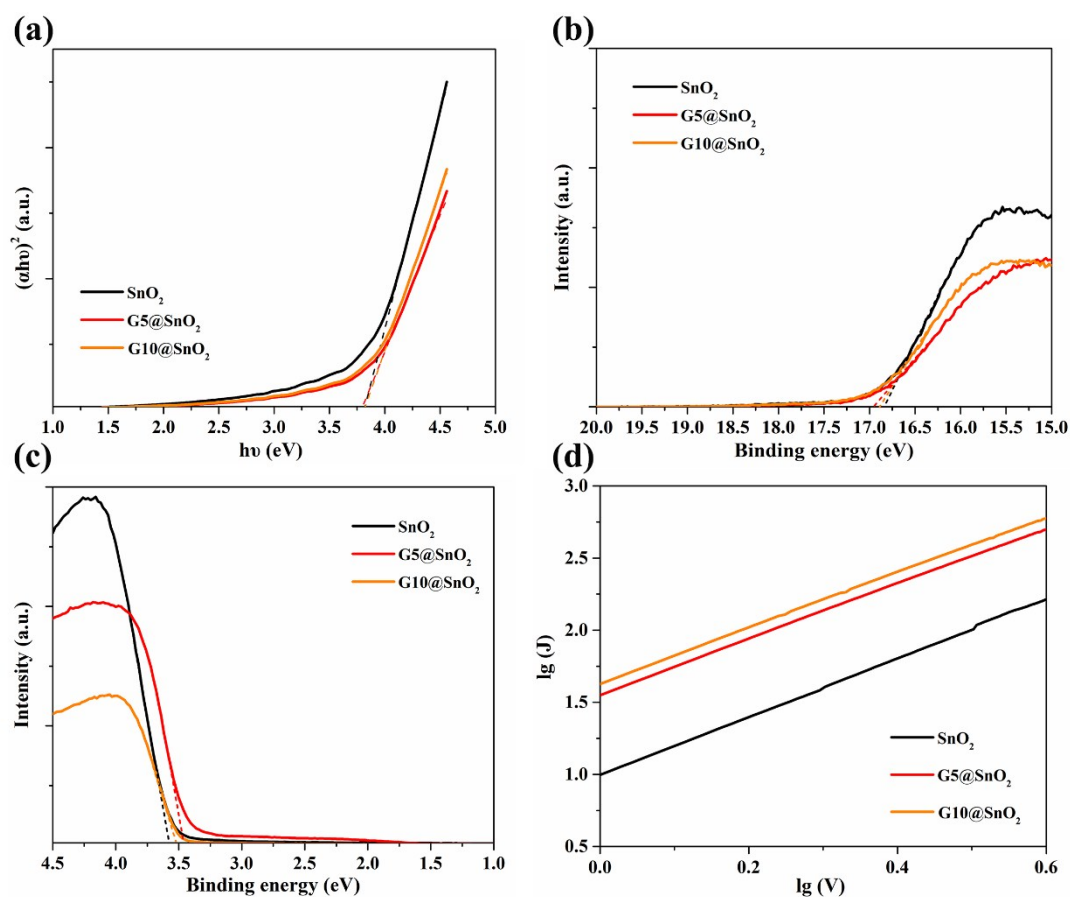

**Fig. S5.** Band structure properties of different ETLs. (a) Relationship of  $(\alpha h\nu)^2$  vs energy; ultraviolet photoelectron spectroscopy (UPS) spectra describing (b) cut-off

energy ( $E_{\text{cutoff}}$ ) and (c) Fermi edge ( $E_F$ , edge); (d)  $\lg(J)$ – $\lg(V)$  curves using space-charge-limited current (SCLC) model with ETL-only devices for  $\text{SnO}_2$ ,  $\text{G5@SnO}_2$ ,  $\text{G10@SnO}_2$ , respectively.

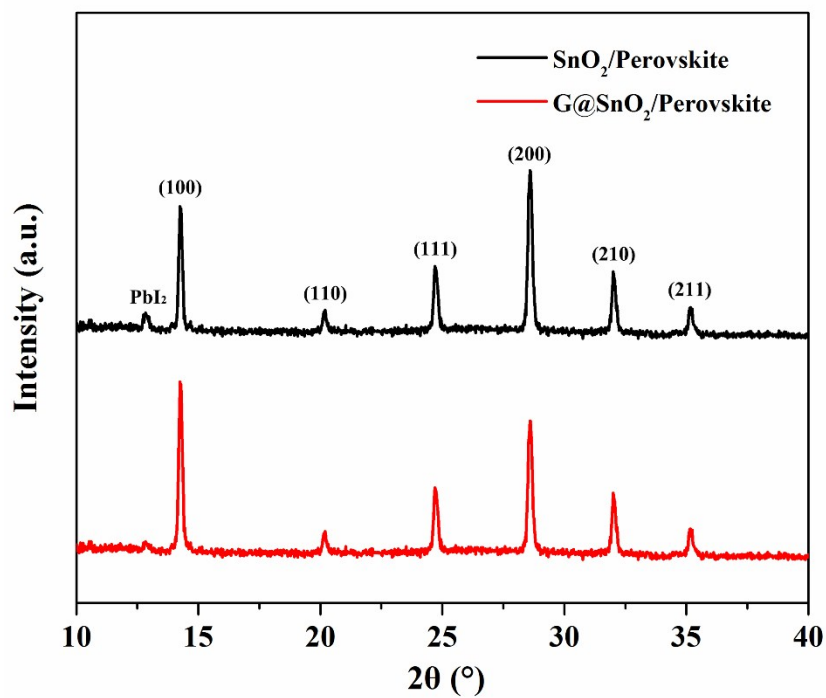

**Fig. S6.** XRD spectra of mixed perovskite films on pristine  $\text{SnO}_2$  and  $\text{G@SnO}_2$  substrates.

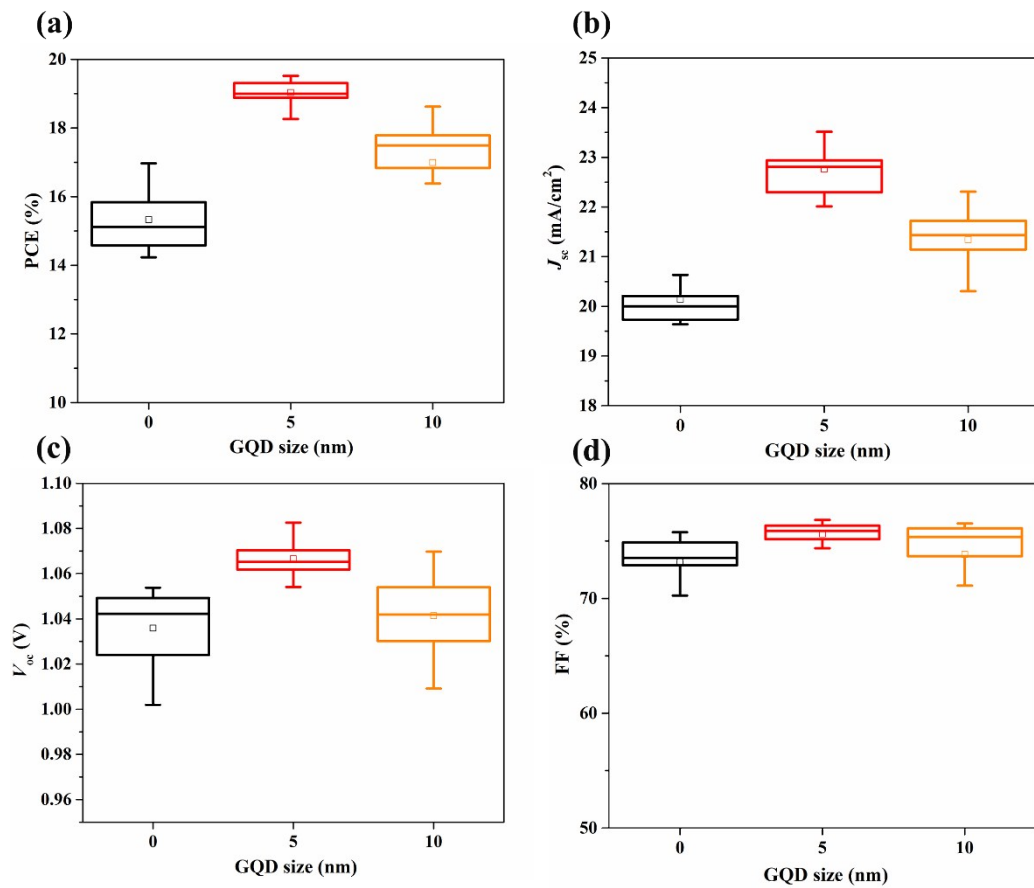

**Fig. S7.** Photovoltaic parameters of rigid PSCs based on G@SnO<sub>2</sub> ETLs with different GQD sizes: (a) PCE; (b)  $J_{sc}$ ; (c)  $V_{oc}$  (d) FF. Device parameters were collected from 14 devices for each GQD size.

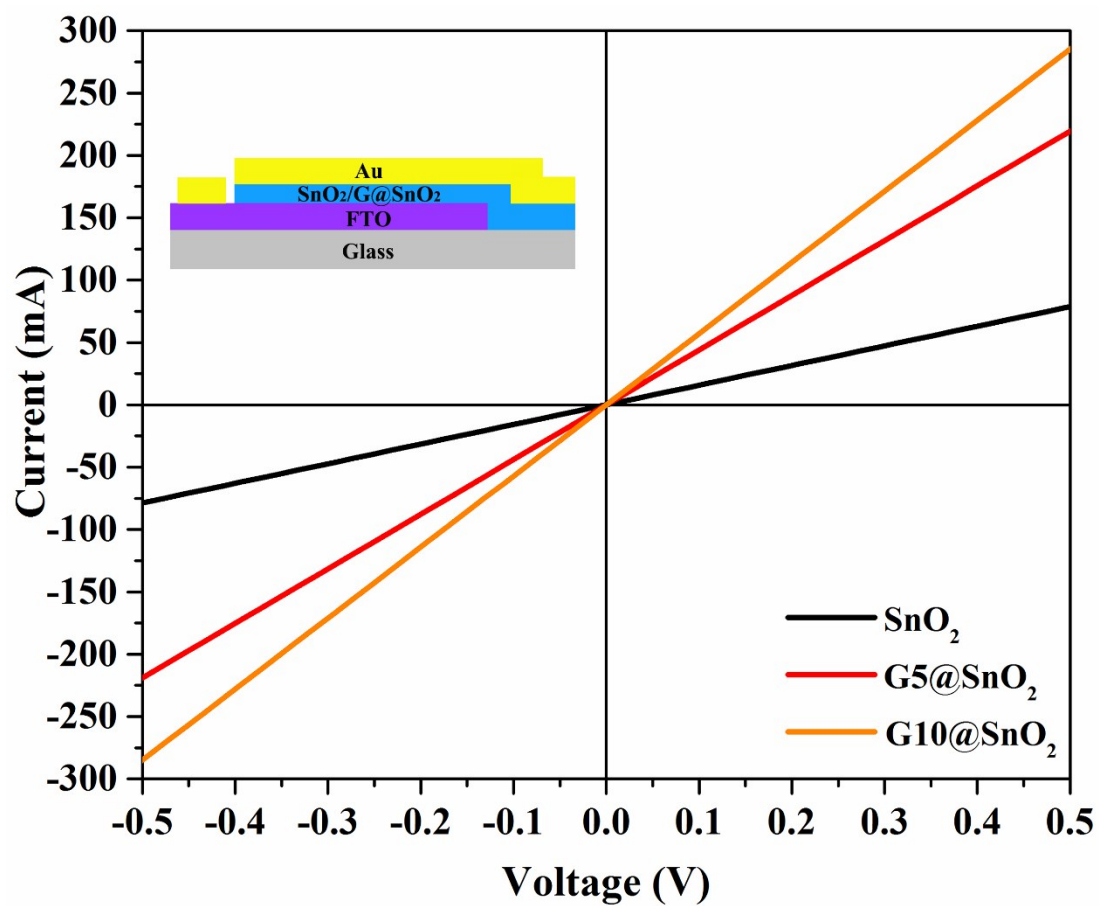

**Fig. S8.** Linear sweep voltammetry (LSV) curves of FTO/SnO<sub>2</sub>/Au (black line), FTO/G5@SnO<sub>2</sub>/Au (red line) and FTO/G10@SnO<sub>2</sub>/Au (orange line) with an inset of device architecture for LSV measurement



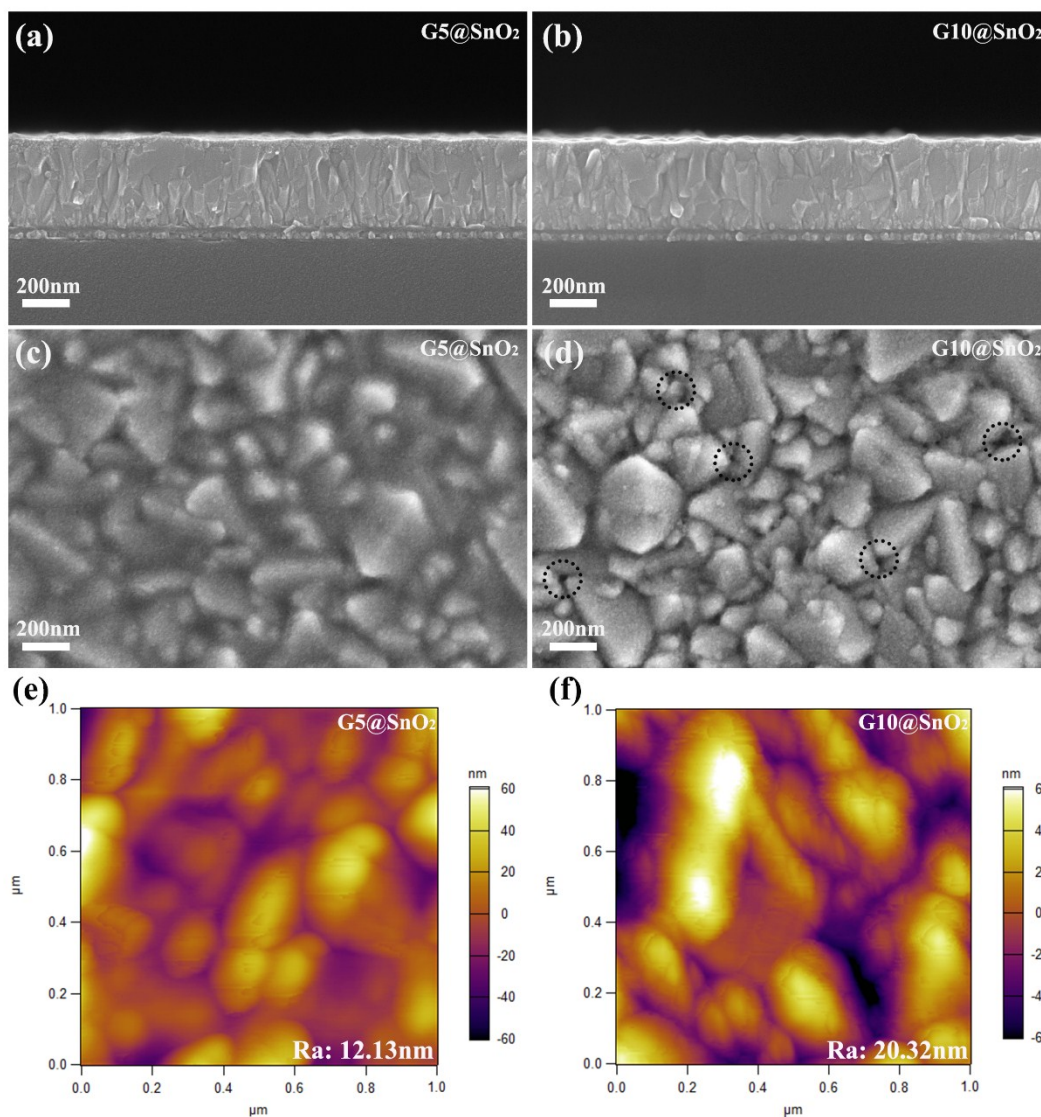

**Fig. S9.** Cross-sectional SEM images of (a) G5@SnO<sub>2</sub> and (b) G10@SnO<sub>2</sub> on FTO substrates; Top-view SEM images of (c) G5@SnO<sub>2</sub>, and (d) G10@SnO<sub>2</sub> on FTO substrates (pinholes were marked by black circles); Surface AFM images of (e) G5@SnO<sub>2</sub>, and (f) G10@SnO<sub>2</sub> on FTO substrates.

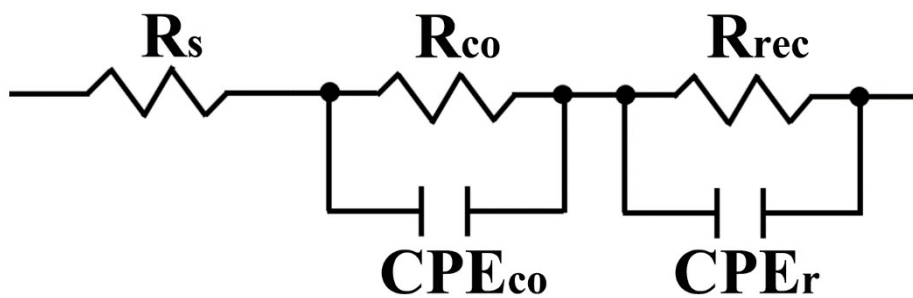

**Fig. S10.** The equivalent circuit model for PSCs in EIS under dark condition.

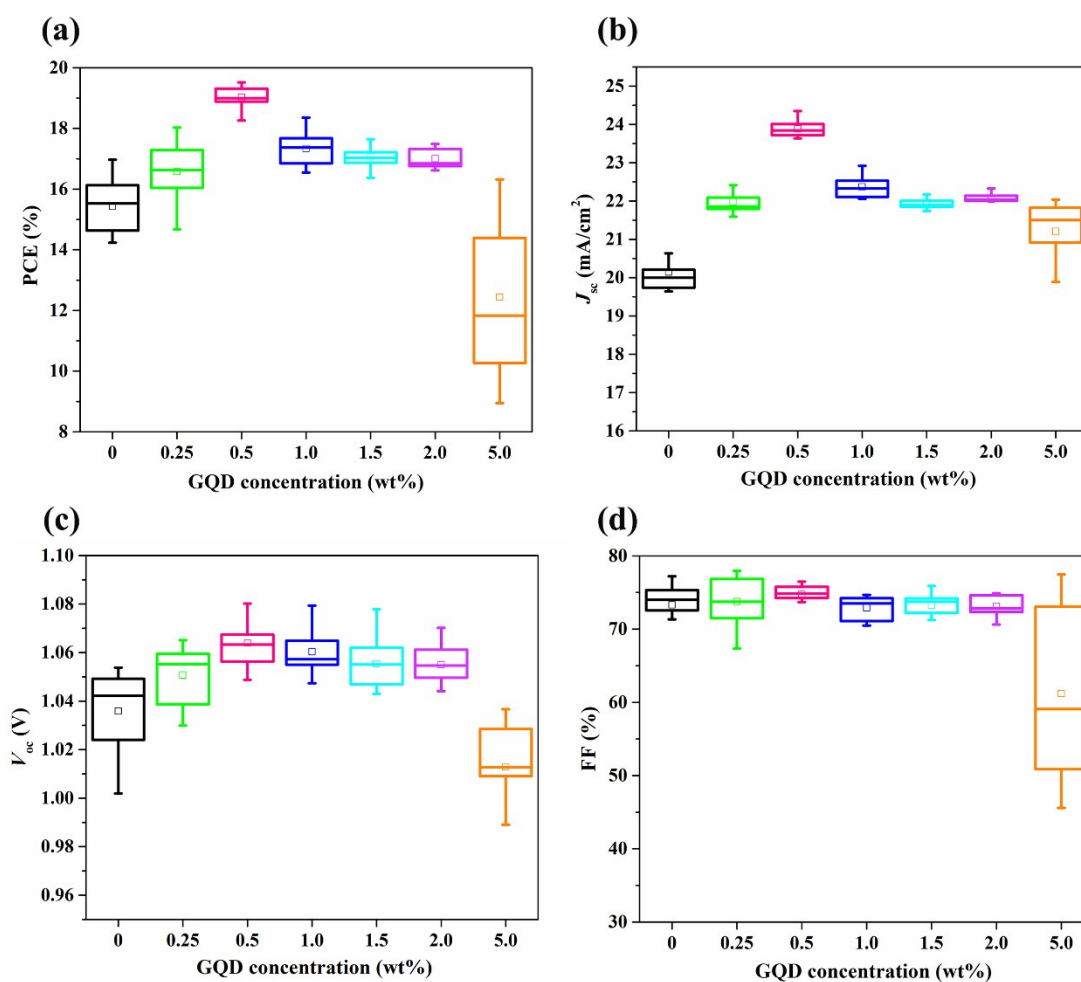

**Fig. S11.** Photovoltaic parameters of rigid PSCs based on G5@SnO<sub>2</sub> ETLs with different GQD concentrations: (a) PCE; (b)  $J_{sc}$ ; (c)  $V_{oc}$ ; (d) FF. The device parameters were collected from 14 devices for each GQD concentration.

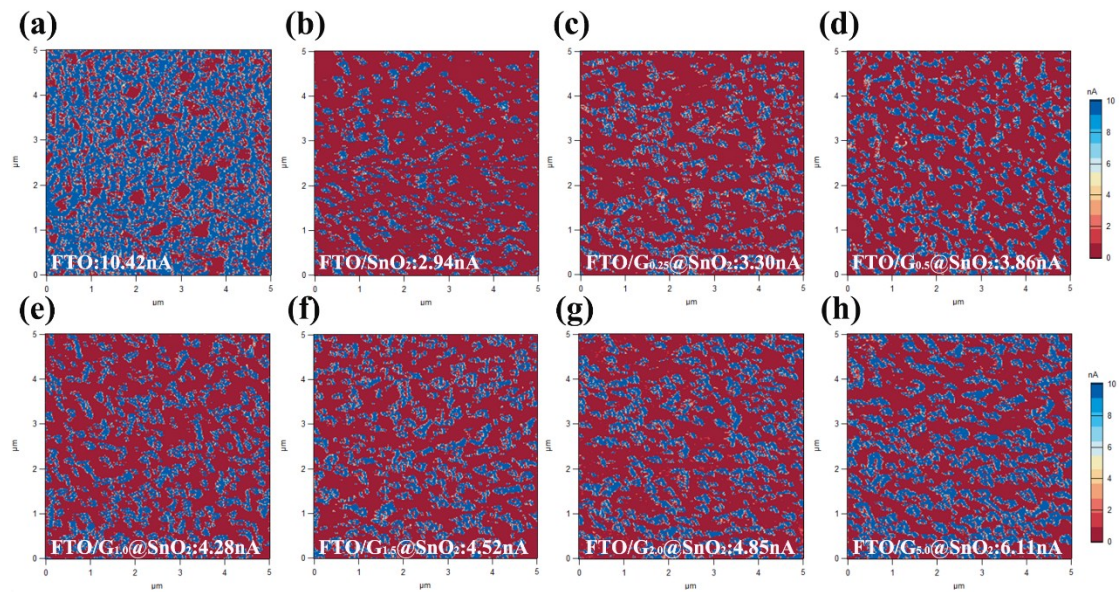

**Fig. S12.** CAFM images and average detected current values of G5@SnO<sub>2</sub> films on FTO substrates with different GQD concentrations under a bias of 1 V: (a) FTO; (b) 0 wt%; (c) 0.25 wt%; (d) 0.5 wt%; (e) 1.0 wt%; (f) 1.5 wt%; (g) 2.0 wt%; (h) 5.0 wt%. The scale bar represents the current detected by contacted probe in a range of 0 to 10 nA.

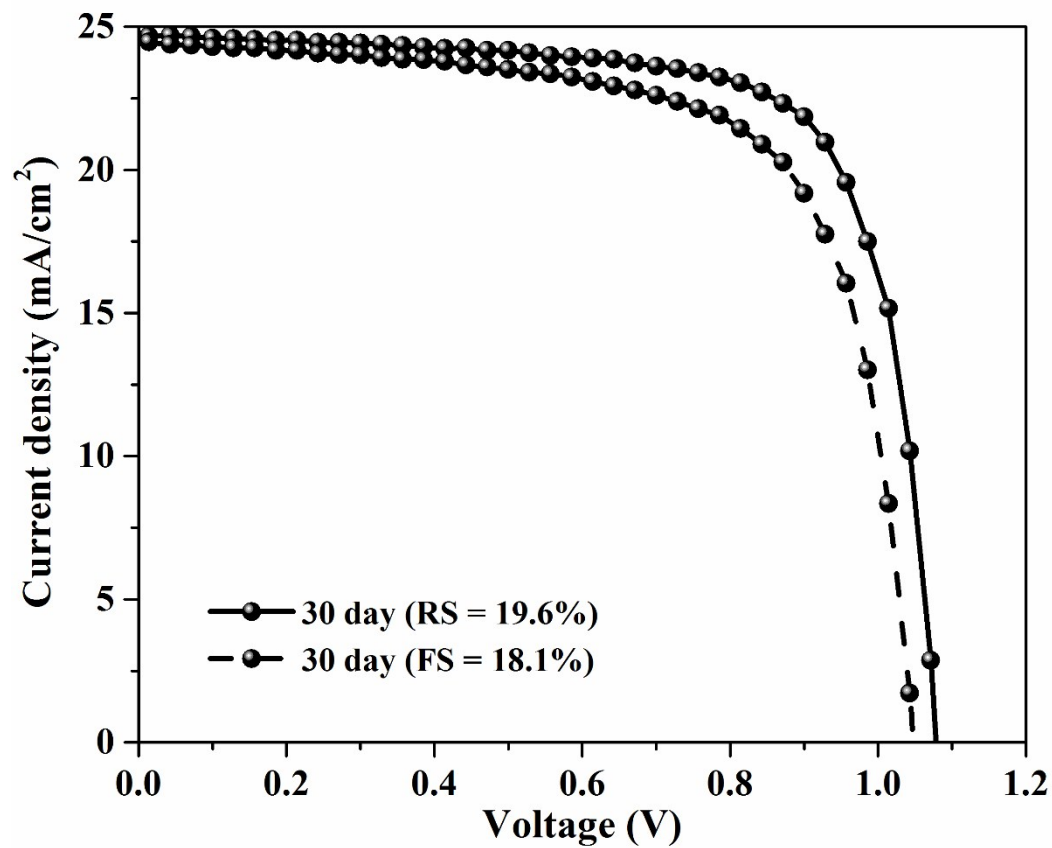

**Fig. S13.**  $J$ - $V$  curves of the best rigid device with  $G_{0.55}@SnO_2$  ETL after 30-days storing in ambient air (unencapsulated device, T: 25 °C, RH: 25%).

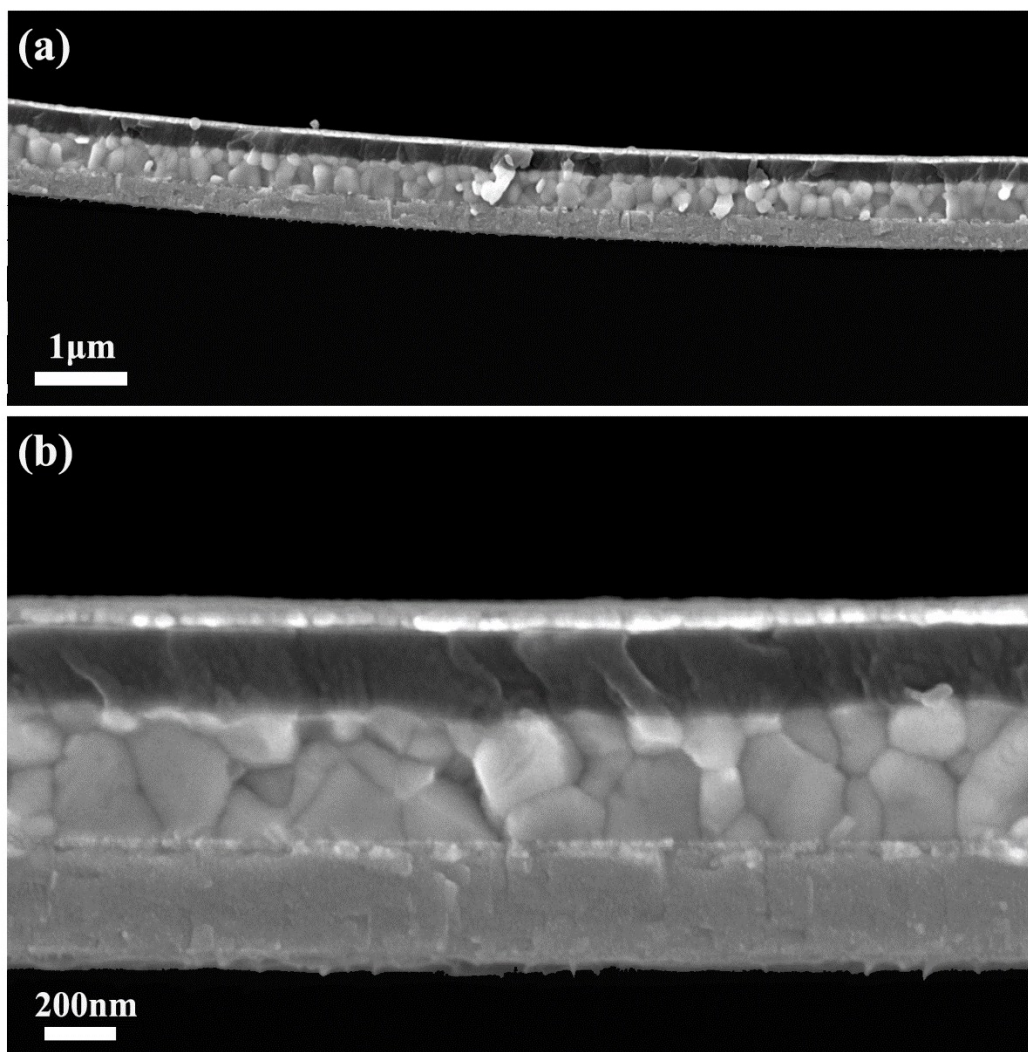

**Fig. S14.** Cross-sectional SEM images of G5@SnO<sub>2</sub> based flexible perovskite solar cells: (a) large scale size with 1 μm with bending angle; (b) small scale size with 200 nm.



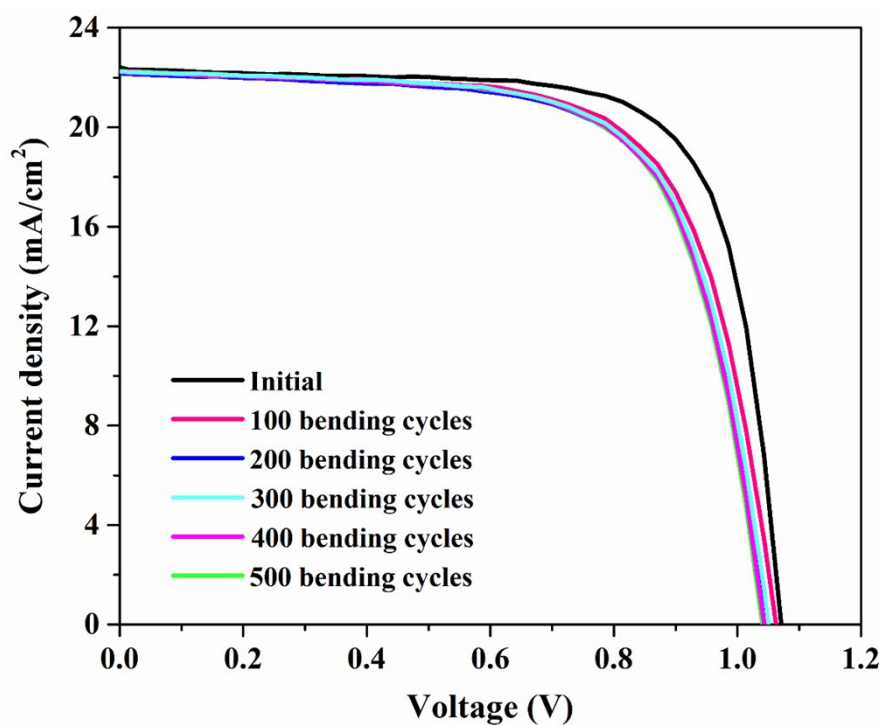

**Fig. S15.**  $J$ – $V$  curves measured after various bending cycles of flexible PSCs with a bending radius of 7 mm.

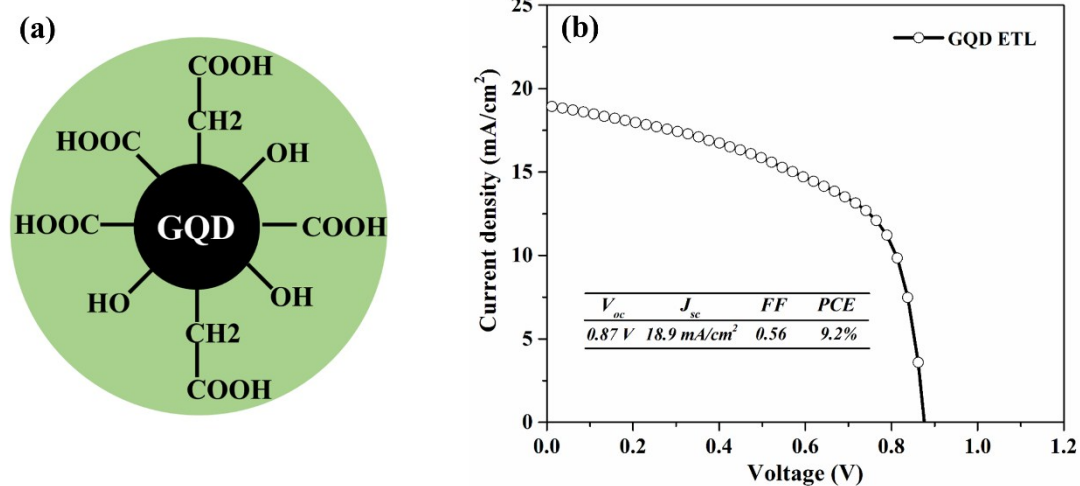

**Fig. S16.** (a) Schematic diagram of as-synthesized GQD; (b) Best  $J$ – $V$  curve of pure GQD ETL based PSC.

**Table S1** Calculated conductivities of SnO<sub>2</sub> and G@SnO<sub>2</sub> ETLs.

| ETLs                 | Slope ( $I/V$ ) | Thickness (nm) | Conductivity (S/m)    |
|----------------------|-----------------|----------------|-----------------------|
| SnO <sub>2</sub>     | 157.11          | $\approx 30$   | $2.36 \times 10^{-4}$ |
| G5@SnO <sub>2</sub>  | 438.20          | $\approx 30$   | $6.58 \times 10^{-4}$ |
| G10@SnO <sub>2</sub> | 565.28          | $\approx 30$   | $8.48 \times 10^{-4}$ |

**Table S2** Summary of fitted time-resolved photoluminescence spectra of perovskite films based on G@SnO<sub>2</sub> with different sizes of GQD.

| Substrates                 | $A_1$ | $\tau_1$ (ns) | $A_2$ | $\tau_2$ (ns) |
|----------------------------|-------|---------------|-------|---------------|
| Glass                      | 0.35  | 2.9           | 0.65  | 466.5         |
| Glass/SnO <sub>2</sub>     | 0.45  | 3.6           | 0.55  | 402.7         |
| Glass/G5@SnO <sub>2</sub>  | 0.57  | 2.3           | 0.43  | 254.3         |
| Glass/G10@SnO <sub>2</sub> | 0.46  | 3.7           | 0.54  | 256.5         |

**Table S3** EIS parameters for PSCs under dark condition.

| ETLs                 | $R_s$ ( $\Omega$ ) | $R_{\text{rec}}$ ( $\Omega$ ) |
|----------------------|--------------------|-------------------------------|
| SnO <sub>2</sub>     | 15.3               | 229.0                         |
| G5@SnO <sub>2</sub>  | 14.5               | 357.2                         |
| G10@SnO <sub>2</sub> | 13.4               | 270.1                         |
